# Supplementary material
Source: publisher figshare collection journal article supplement (https://gsapubs.figshare.com/articles/dataset/_/17695922)
Supplement: Supplementary file 1 [file 1]

# Supplemental File S2: Dike paleopole data

Supplemental Material for Malone, D., Craddock, J., Wallenberg, A., Gaschot, B., and Luczaj, J.A., 2022, Geology of Chief Joseph Pass, Wyoming: Crest of Rattlesnake Mountain anticline and escape path of the Eocene Heart Mountain slide, in Craddock, J.P., Malone, D.H., Foreman, B.Z., and Konstantinou, A., eds., Tectonic Evolution of the Sevier-Laramide Hinterland, Thrust Belt, and Foreland, and Postorogenic Slab Rollback (180–20 Ma): Geological Society of America Special Paper 555, [https://doi.org/10.1130/2022.2555\(12\)](https://doi.org/10.1130/2022.2555(12)).

## Sample: MD1

PCA dec 324.31 / inc 21.99  
PCA MAD1 40.21 / MAD3 3.52  
(0.75 -0.54 0.37)t

| demag. | dec.  | inc. | int.     | m.s. |
|--------|-------|------|----------|------|
| * 0    | 321.0 | 21.0 | 2.87e+01 | -    |
| * 5    | 325.0 | 20.0 | 5.20e+01 | -    |
| * 10   | 324.0 | 26.0 | 3.40e+01 | -    |
| * 15   | 331.0 | 24.0 | 1.84e+01 | -    |
| * 20   | 317.0 | 28.0 | 1.02e+01 | -    |
| * 25   | 318.0 | 26.0 | 6.00e+00 | -    |
| * 30   | 316.0 | 26.0 | 2.99e+00 | -    |

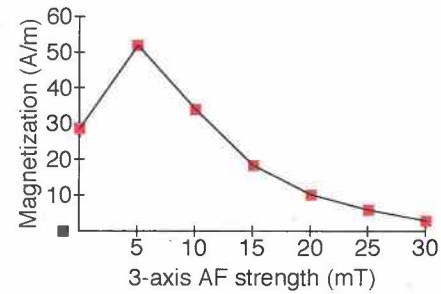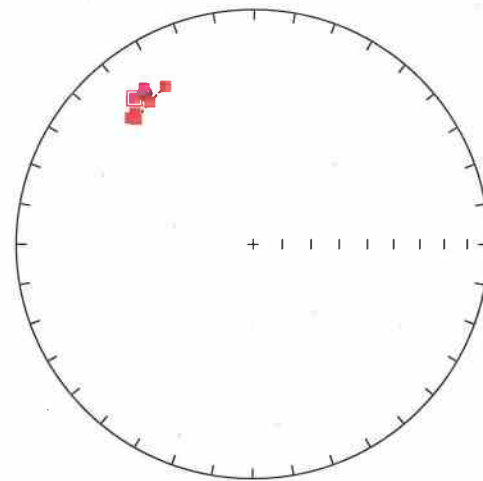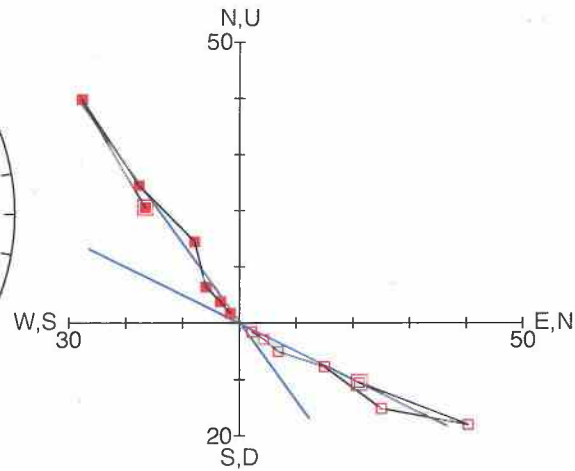

□ vertical  
■ horizontal  
Units: A/m ×100

Sample: MD2

PCA dec 344.38 / inc 15.43  
PCA MAD1 21.62 / MAD3 2.28  
(0.93 -0.26 0.27)t

| demag. | dec.  | inc. | int.     |
|--------|-------|------|----------|
| * 0    | 349.0 | 9.0  | 9.23e+00 |
| * 5    | 344.0 | 15.0 | 3.49e+01 |
| * 10   | 345.0 | 17.0 | 2.06e+01 |
| * 15   | 344.0 | 18.0 | 9.61e+00 |
| * 20   | 338.0 | 21.0 | 4.39e+00 |
| * 25   | 338.0 | 24.0 | 2.19e+00 |
| * 30   | 334.0 | 31.0 | 1.08e+00 |

m.s.

-  
-  
-  
-  
-  
-  
-

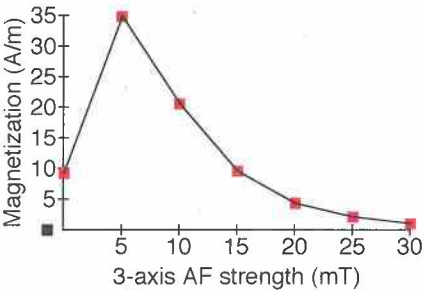

□ vertical  
■ horizontal  
Units: A/m ×100

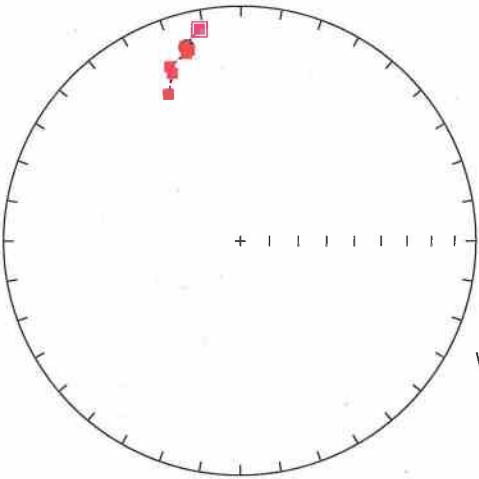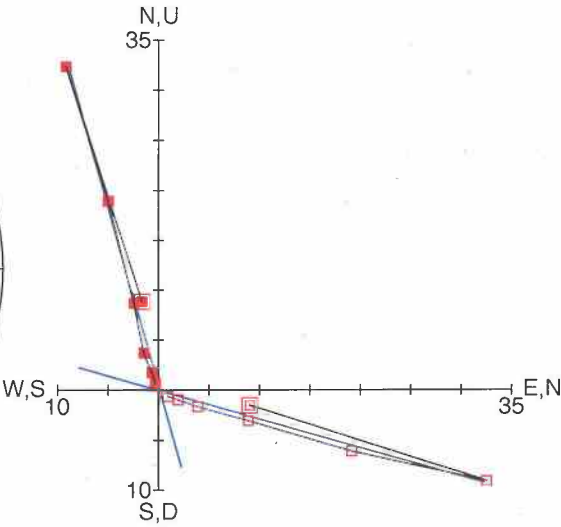

Sample: MD3

PCA dec 357.40 / inc 9.31  
PCA MAD1 31.83 / MAD3 1.92  
(0.99 -0.04 0.16)t

| demag. | dec.  | inc. | int.     | m.s. |
|--------|-------|------|----------|------|
| * 0    | 356.0 | 3.0  | 5.30e+00 | -    |
| * 5    | 357.0 | 9.0  | 2.77e+01 | -    |
| * 10   | 0.0   | 11.0 | 1.26e+01 | -    |
| * 15   | 357.0 | 11.0 | 7.00e+00 | -    |
| * 20   | 354.0 | 13.0 | 2.88e+00 | -    |
| * 25   | 349.0 | 22.0 | 1.36e+00 | -    |
| * 30   | 355.0 | 25.0 | 6.56e-01 | -    |

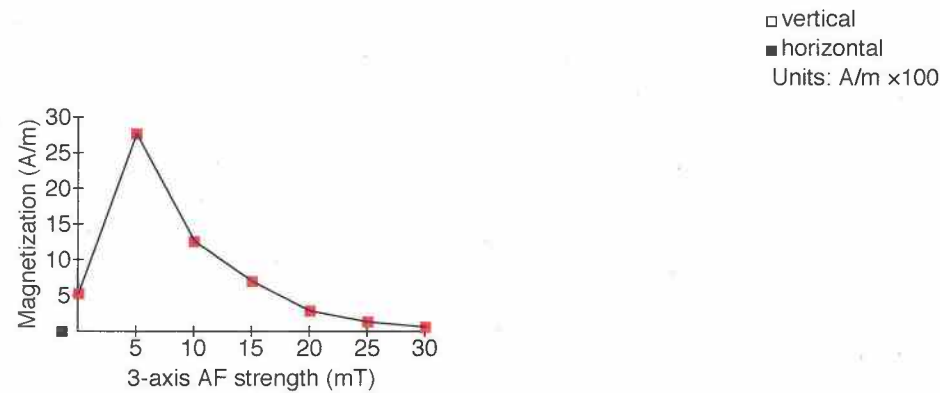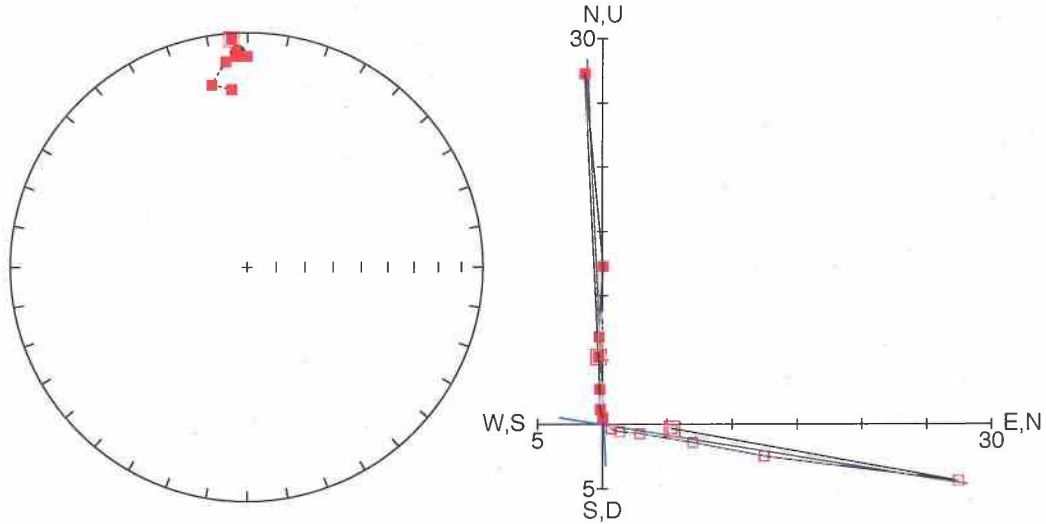

Sample: MD4

PCA dec 351.86 / inc 6.54  
PCA MAD1 17.27 / MAD3 2.51  
(0.98 -0.14 0.11)t

| demag. | dec.  | inc. | int.     |
|--------|-------|------|----------|
| * 0    | 351.0 | 9.0  | 1.20e+01 |
| * 5    | 352.0 | 5.0  | 5.93e+01 |
| * 10   | 351.0 | 8.0  | 3.64e+01 |
| * 15   | 354.0 | 11.0 | 2.04e+01 |
| * 20   | 351.0 | 16.0 | 1.03e+01 |
| * 25   | 352.0 | 13.0 | 5.51e+00 |
| * 30   | 350.0 | 16.0 | 3.01e+00 |

m.s.  
-  
-  
-  
-  
-  
-  
-  
-

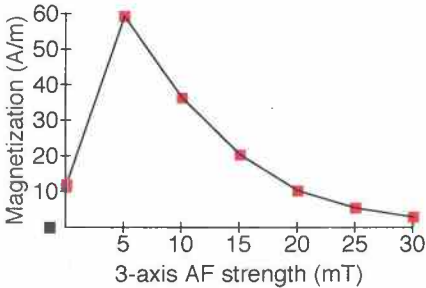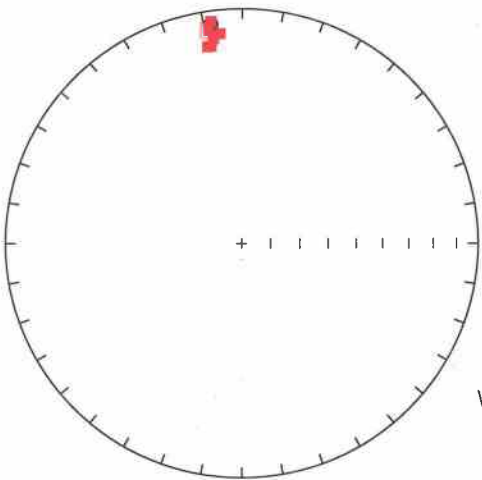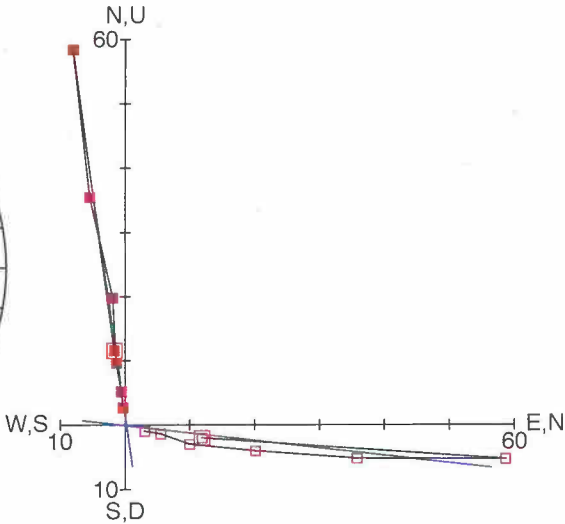

□ vertical  
■ horizontal  
Units: A/m ×100

Sample: MD5

PCA dec 356.87 / inc 8.64  
PCA MAD1 11.81 / MAD3 4.06  
(0.99 -0.05 0.15)t

| demag. | dec.  | inc. | int.     |
|--------|-------|------|----------|
| * 0    | 4.0   | 8.0  | 1.16e+01 |
| * 5    | 359.0 | 8.0  | 4.87e+01 |
| * 10   | 351.0 | 10.0 | 2.82e+01 |
| * 15   | 351.0 | 9.0  | 1.34e+01 |
| * 20   | 350.0 | 16.0 | 6.40e+00 |
| * 25   | 350.0 | 18.0 | 3.07e+00 |
| * 30   | 349.0 | 21.0 | 1.53e+00 |

m.s.

-  
-  
-  
-  
-  
-  
-

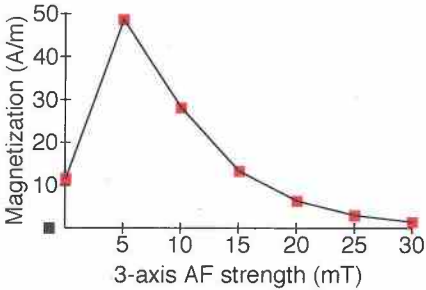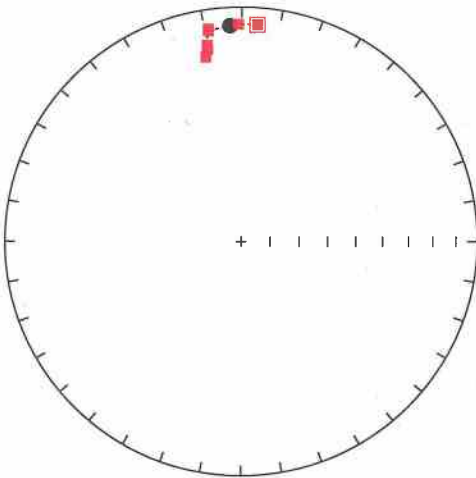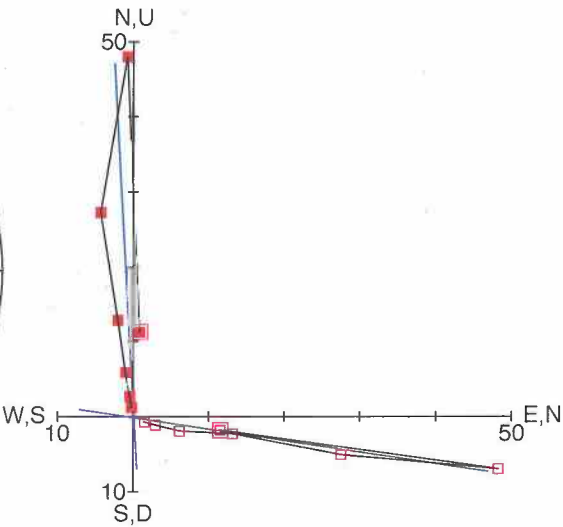

□ vertical  
■ horizontal  
Units: A/m ×100

Sample: MD6

PCA dec 359.02 / inc 11.77  
PCA MAD1 34.39 / MAD3 2.23  
(0.98 -0.02 0.20)t

| demag. | dec.  | inc. | int.     |
|--------|-------|------|----------|
| * 0    | 8.0   | 8.0  | 8.60e+00 |
| * 5    | 359.0 | 12.0 | 4.17e+01 |
| * 10   | 359.0 | 12.0 | 2.31e+01 |
| * 15   | 355.0 | 8.0  | 1.12e+01 |
| * 20   | 357.0 | 18.0 | 5.25e+00 |
| * 25   | 352.0 | 16.0 | 2.26e+00 |
| * 30   | 352.0 | 25.0 | 1.22e+00 |

m.s.  
-  
-  
-  
-  
-  
-  
-

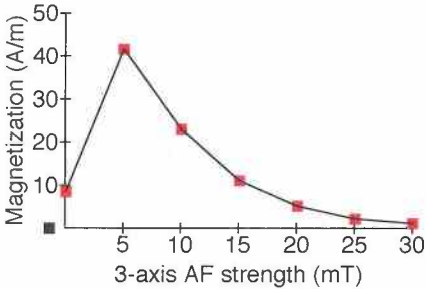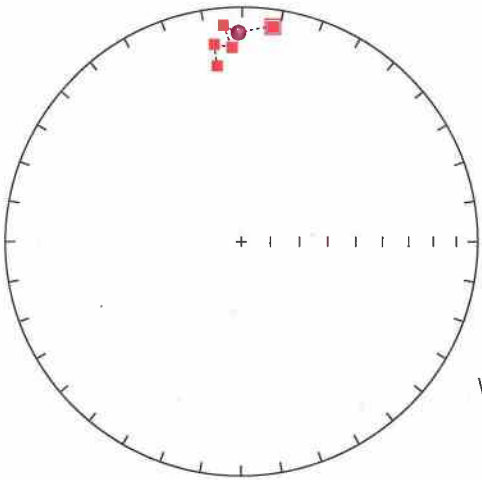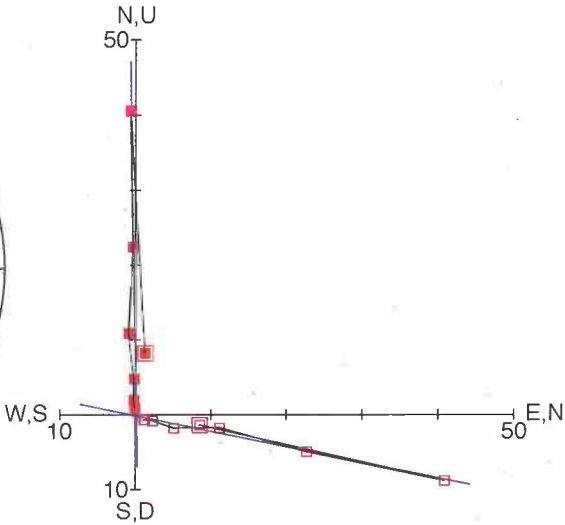

□ vertical  
■ horizontal  
Units: A/m ×100

Sample: MD7

PCA dec 4.01 / inc 5.21  
PCA MAD1 24.01 / MAD3 2.08  
(0.99 0.07 0.09)t

| demag. | dec.  | inc. | int.     |
|--------|-------|------|----------|
| * 0    | 5.0   | 3.0  | 1.81e+01 |
| * 5    | 3.0   | 5.0  | 5.98e+01 |
| * 10   | 7.0   | 6.0  | 3.81e+01 |
| * 15   | 3.0   | 5.0  | 1.98e+01 |
| * 20   | 358.0 | 9.0  | 9.37e+00 |
| * 25   | 358.0 | 9.0  | 4.38e+00 |
| * 30   | 359.0 | 6.0  | 1.78e+00 |

m.s.

-  
-  
-  
-  
-  
-  
-

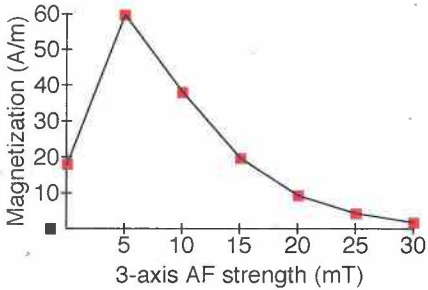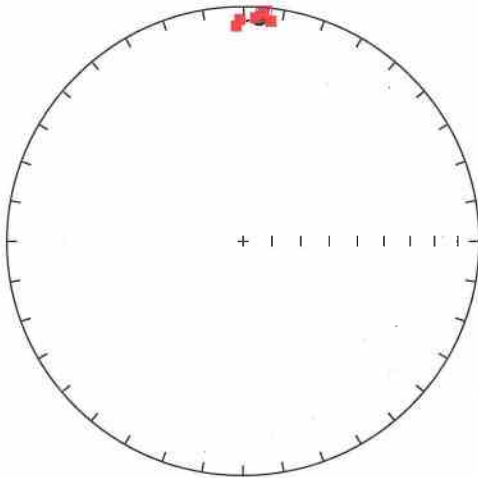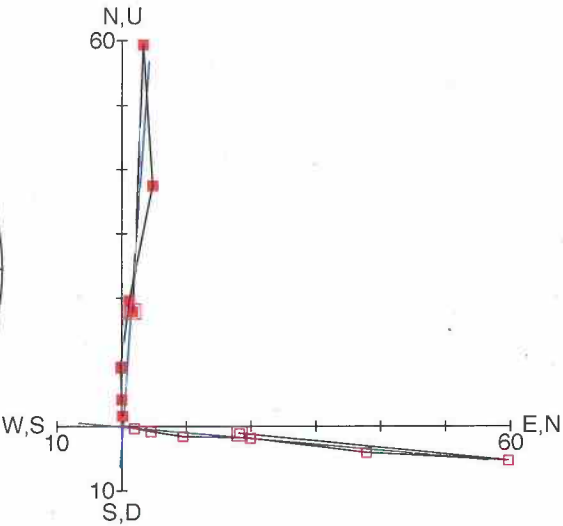

□ vertical  
■ horizontal  
Units: A/m ×100

# Sample: MD8

PCA dec 358.59 / inc 10.62  
 PCA MAD1 25.45 / MAD3 2.31  
 (0.98 -0.02 0.18)t

| demag. | dec.  | inc. | int.     |
|--------|-------|------|----------|
| * 0    | 3.0   | 4.0  | 1.35e+01 |
| * 5    | 359.0 | 11.0 | 4.88e+01 |
| * 10   | 356.0 | 11.0 | 3.07e+01 |
| * 15   | 1.0   | 10.0 | 1.51e+01 |
| * 20   | 1.0   | 11.0 | 7.37e+00 |
| * 25   | 356.0 | 15.0 | 3.01e+00 |
| * 30   | 356.0 | 11.0 | 1.08e+00 |

m.s.

-  
-  
-  
-  
-  
-  
-

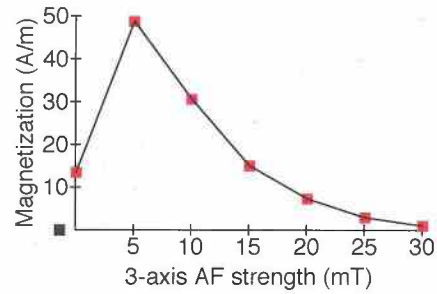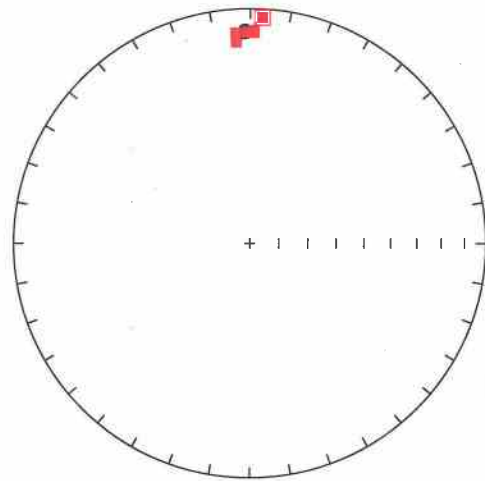

□ vertical  
 ■ horizontal  
 Units: A/m ×100

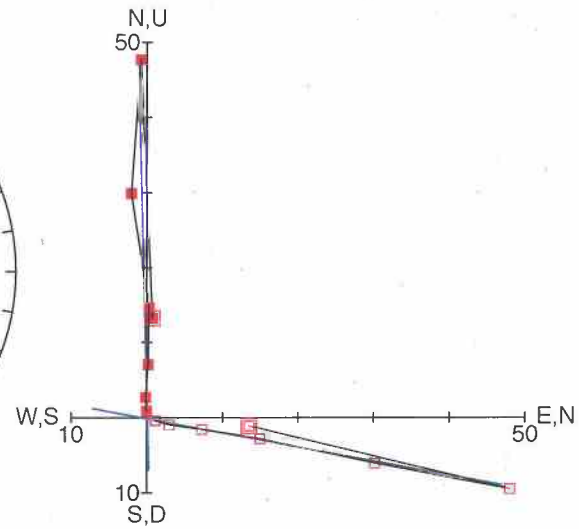



Sample: MD9

PCA dec 9.87 / inc 2.80  
PCA MAD1 14.01 / MAD3 3.33  
(0.98 0.17 0.05)t

| demag. | dec. | inc. | int.     |
|--------|------|------|----------|
| * 0    | 13.0 | -5.0 | 2.69e+01 |
| * 5    | 10.0 | 4.0  | 6.28e+01 |
| * 10   | 9.0  | 2.0  | 4.08e+01 |
| * 15   | 7.0  | 6.0  | 1.97e+01 |
| * 20   | 8.0  | 12.0 | 8.85e+00 |
| * 25   | 8.0  | 15.0 | 3.88e+00 |
| * 30   | 4.0  | 10.0 | 2.04e+00 |

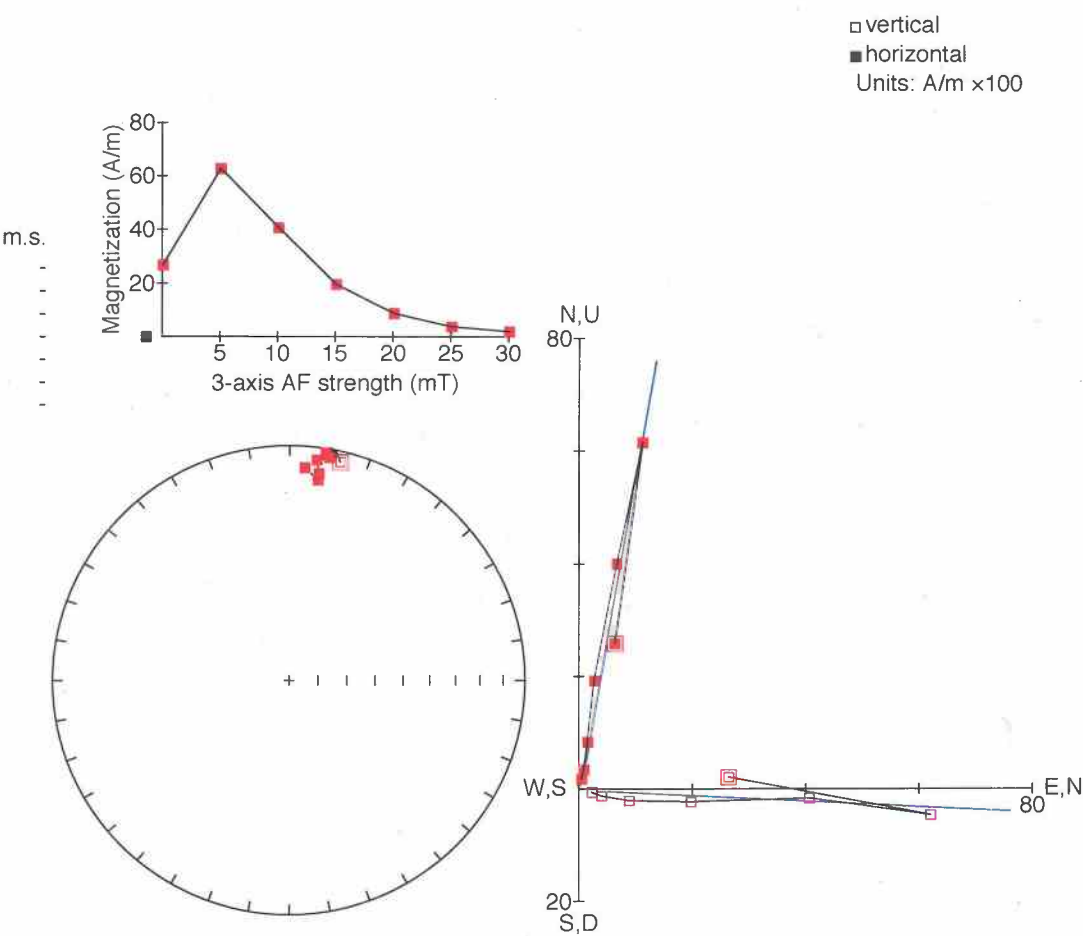

Sample: MD10

PCA dec 5.44 / inc 5.37  
PCA MAD1 19.10 / MAD3 3.38  
(0.99 0.09 0.09)t

| demag. | dec. | inc. | int.     |
|--------|------|------|----------|
| * 0    | 10.0 | 8.0  | 1.06e+01 |
| * 5    | 3.0  | 5.0  | 5.26e+01 |
| * 10   | 10.0 | 5.0  | 3.59e+01 |
| * 15   | 7.0  | 8.0  | 1.78e+01 |
| * 20   | 4.0  | 10.0 | 7.29e+00 |
| * 25   | 2.0  | 12.0 | 3.40e+00 |
| * 30   | 3.0  | 20.0 | 1.57e+00 |

m.s.

-  
-  
-  
-  
-  
-  
-

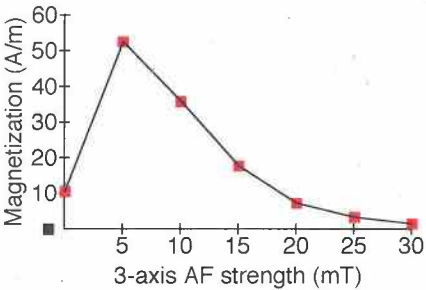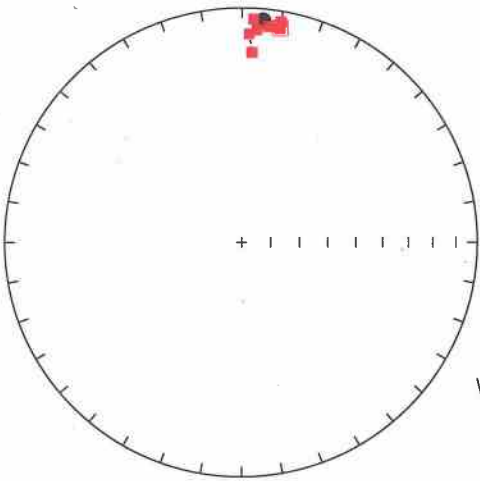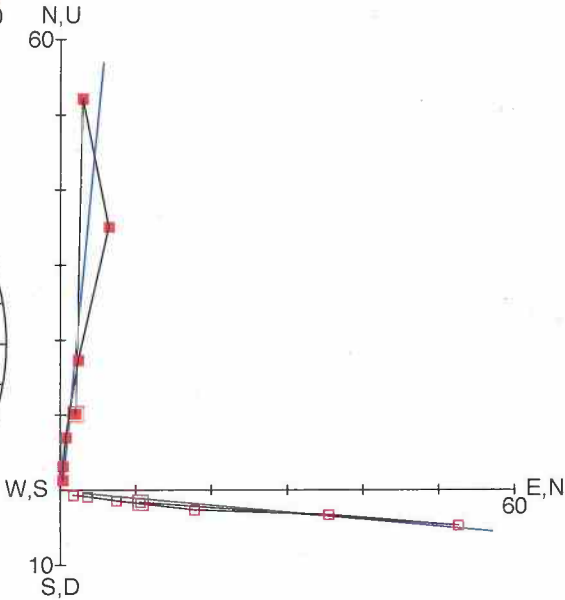

□ vertical  
■ horizontal  
Units: A/m ×100
