# Supplementary material
Source: publisher figshare collection journal article supplement (https://gsapubs.figshare.com/articles/dataset/_/17695922)
Supplement: Supplementary file 2 [file 1]

## Supplemental File S1: Injectite AMS Results

| Injectite | Dmax (in-situ) | Imax (in-situ) | Dmin (in-situ) | Imin (in-situ) |         |
|-----------|----------------|----------------|----------------|----------------|---------|
| DI1-01    | 135            | 35.2644        | 26.5651        | 24.0948        | 0°, 90° |
| DI1-01    | 90             | 45             | 206.565        | 24.0948        |         |
| DI1-02    | 270            | 22.5           | 90             | 67.5           |         |
| DI1-02    | 10.8896        | 58.689         | 195.695        | 31.2215        |         |
| DI1-03    | 180            | 45             | -1.84249E-14   | 45             |         |
| DI1-03    | 33.5611        | 12.4927        | 143.447        | 56.9215        |         |
| DI1-04    | 37.9819        | 2.29213E-14    | 128            | 1.4385E-14     |         |
| DI1-04    | 253.874        | 63.1529        | 103            | 23.995         |         |
| DI1-05    | 136.822        | 6.51654        | 230.601        | 29.983         |         |
| DI1-06    | 246.197        | 30.8125        | 51.5328        | 58.3463        |         |
| DI1-07    | 105            | 10.7286        | 198.435        | 17.5484        |         |
| DI1-08    | -1.25983E-13   | 5.05583E-15    | 270            | 80.7825        |         |
| DI1-09    | 315            | 11.0009        | 135            | 78.9991        |         |
| DI1-10    | 28.7981        | 16.3811        | 125            | 18.5317        |         |
| DI1-11    | 331            | 14.1838        | 84.8105        | 48.3894        |         |
| DI1-12    | 14.4437        | 45.815         | 133.045        | 24.952         |         |
| DI1-13    | 10.4556        | 21.6897        | 239.135        | 58.936         |         |
| DI1-14    | 155            | 15.5609        | 294            | 69.5519        |         |
| DI1-15    | 283            | 49.9119        | 32.8524        | 16.5727        |         |

| Injectite #2 | Dmax (in-situ) | Imax (in-situ) | Dmin (in-situ) | Imin (in-situ) |         |
|--------------|----------------|----------------|----------------|----------------|---------|
| DI8-01       | 14.4437        | 45.815         | 133.045        | 24.952         | 0°, 90° |
| DI8-02       | 265.722        | 17.8747        | 153            | 50.3756        |         |
| DI8-03       | 211.717        | 4.94432E-14    | 311            | 90             |         |
| DI8-04       | 167            | 52.4485        | 281            | 17.4873        |         |
| DI8-05       | 337            | 69.5519        | 116            | 15.5609        |         |
| DI8-06       | 249.741        | 47.6666        | 10.9755        | 25.2857        |         |
| DI8-07       | 173.904        | 49.7794        | 67.5375        | 13.4035        |         |
| DI8-08       | 6.98405E-13    | 18.4349        | 180            | 71.565         |         |
| DI8-09       | 350            | 10.3702        | 249.581        | 43.1421        |         |
| DI8-10       | 100            | 40.9668        | 243.968        | 43.1109        |         |
| DI8-11       | 6.4302         | 33.3342        | 221.583        | 51.1853        |         |
| DI8-12       | 5.91621        | 34.7579        | 97             | 1.34488        |         |
| DI8-13       | 315            | 35.2644        | 135            | 54.7356        |         |
| DI8-14       | 187.978        | 35.7449        | 93.9924        | 5.5163         |         |
| DI8-15       | 267.611        | 9.34455        | 6.36218        | 42.7556        |         |
| DI8-16       | 329            | 18.6448        | 225            | 35.2644        |         |
| DI8-17       | 320            | 20.0049        | 193.362        | 58.1254        |         |
| DI8-18       | 304            | 27.3124        | 79.5938        | 54.4073        |         |

|        |              |         |         |             |
|--------|--------------|---------|---------|-------------|
| DI8-19 | 157.773      | 6.09116 | 252.512 | 37.749      |
| DI8-20 | 258.541      | 52.3228 | 94.4293 | 36.6032     |
| DI8-21 | 289          | 12.0939 | 21.4888 | 15.4788     |
| DI8-22 | -2.14163E-13 | 16.845  | 270     | 1.58004E-14 |
| DI8-23 | 125.264      | 30      | 234.736 | 30          |
| DI8-24 | 197.462      | 12.7528 | 99      | 34.2909     |
| DI8-25 | 281          | 1.62151 | 16.7152 | 70.452      |
| DI8-26 | 185.294      | 7.53487 | 306     | 75.5045     |

Key: D=Trend, I=Plunge
